1 **A marine probiotic treatment against the bacterial pathogen *Vibrio***  
2 ***coralliilyticus* to improve the performance of Pacific (*Crassostrea gigas*) and**  
3 **Kumamoto (*C. sikamea*) oyster larvae**

4

5

6

7 David Madison<sup>a1</sup>, Carla Schubiger<sup>b</sup>, Spencer Lunda<sup>b</sup>, Ryan S. Mueller<sup>c</sup>, Chris Langdon<sup>a</sup>

8 Corresponding author: [carla.schubiger@oregonstate.edu](mailto:carla.schubiger@oregonstate.edu)

9

10 <sup>a</sup>Coastal Oregon Marine Experiment Station and Department of Fisheries and Wildlife, College  
11 of Agricultural Sciences, Oregon State University, Corvallis, Oregon, 97330, USA

12 <sup>b</sup>Department of Biomedical Sciences, Carlson College of Veterinary Medicine, Oregon State  
13 University, Corvallis, Oregon, 97330, USA

14 <sup>c</sup>Department of Microbiology, College of Science, Oregon State University, Corvallis, Oregon,  
15 97330, USA

---

<sup>1</sup> Current address: JL. Trans Balauring, Desa Merdeka, Kecamatan Lebatukan, Kab. Lembata, 86681 NTT, Indonesia

## 16 **Highlights**

- 17       • A novel treatment of three combined marine probiotic bacterial isolates improved acute  
18 survival of early Pacific oyster larvae exposed to a lethal concentration of the highly  
19 virulent *V. coralliilyticus* strain RE22.
- 20       • A single dose of combined probiotics added to one-day-old Pacific oyster larvae  
21 improved their subsequent growth at 14 days post egg-fertilization.
- 22       • Metamorphosis success was increased in two stocks of the Pacific oyster, *Crassostrea*  
23 *gigas*, as well as the Kumamoto oyster, *C. sikamea*, after a single dose of the combined  
24 probiotics was added to one-day-old larvae.

25

26

## 27 **Abstract**

28 Oyster larvae reared in hatcheries on the U.S. West coast often experience severe *Vibrio*  
29 *coralliilyticus*-related mortalities early in their development. Current treatment options for  
30 these molluscs are not available or feasible; however, for decades, probiotics have been  
31 successfully used in finfish and crustacean shellfish culture. Consequently, the objectives of this  
32 work were to 1) isolate marine bacteria from oysters and evaluate their protective activity  
33 against *Vibrio coralliilyticus* infection of Pacific oyster (*Crassostrea gigas*) larvae, and 2) to  
34 determine the long-term effects of probiotic additions on growth and metamorphosis of larval  
35 Pacific and Kumamoto oysters (*C. sikamea*). A combination of three probiotic strains applied  
36 once 24 hours post-fertilization was more effective in improving survival of larval *C. gigas*  
37 exposed to lethal concentrations of *V. coralliilyticus* strain RE22, compared with separate  
38 additions of individual probiotics. In addition, a single application of the probiotic combination  
39 to one-day-old larvae increased the larval metamorphosis success of *C. sikamea* and both the  
40 Midori and Myiagi stocks of *C. gigas*. These results suggest that probiotics are effective at  
41 preventing disease and can significantly improve performance of oyster larvae, using a single  
42 application early in their development.

43

44

45 Keywords: Probiotic; oyster larvae; *Crassostrea gigas*; *Crassostrea sikamea*; *Vibrio coralliilyticus*;  
46 survival; metamorphosis

47

## 48 **1. Introduction**

49 In the USA, oyster farms are largely dependent on high-quality seed (“eyed” larvae) from oyster  
50 hatcheries. Oyster hatcheries, however, have periodically experienced severe larval losses  
51 during the past two decades, leading to seed shortages and supply disruptions (Elston et al.,  
52 2008; Richards et al., 2015). Initially, these losses were mainly attributed to ocean acidification  
53 (Barton et al., 2012; Gray et al., 2022), and currently many hatcheries employ sophisticated  
54 systems that measure and correct acidified incoming water. Unfortunately, these treatments  
55 have not entirely resolved the problem, suggesting other factors, such as pathogens, likely play  
56 a significant role in these losses and contribute to various sub-lethal effects on oyster health  
57 (Marques et al., 2006).

58  
59 Bacteria from the genus *Vibrio* are omnipresent in marine and brackish waters as commensals,  
60 mutualists, or pathogens (Takemura et al., 2014). They are highly adaptable to changing ocean  
61 conditions, including increasing temperature, lower pH, and salinity, and can make up more  
62 than 50% of all detectable microbes during favorable conditions (Gilbert et al., 2012; Oh et al.,  
63 2009; Vezzulli et al., 2010). *Vibrio coralliilyticus* has been linked to massive die-offs of Pacific  
64 oyster (*Crassostrea gigas*) larvae in U.S. West coast hatcheries (Elston et al., 2008; Estes et al.,  
65 2004; Richards et al., 2015) and, occasionally, mortalities in Eastern oysters cultured in U.S. East  
66 coast hatcheries (Kehlet-Delgado et al., 2017). In addition to Pacific and Eastern oysters, this  
67 pathogen affects commercially important Kumamoto oysters (*C. sikamea*), greenshell mussels  
68 (*Perna canaliculus*), and geoduck clams (*Panopea generosa*) (Elston et al., 2008; Estes et al.,  
69 2004; Kesarcodi-Watson et al., 2009; Richards et al., 2015). Furthermore, pathogenic *V.*

70 *coralliilyticus* has been identified globally as a deadly pathogen in various marine species,  
71 including finfish, corals, and several bivalve species (Alves Jr et al., 2009; Austin et al., 2005;  
72 Jeffries, 1982; Kim et al., 2020).

73 Antibiotic interventions against bacterial infections in aquaculture are either not available or  
74 restricted due to the risks of promoting widespread anti-microbial resistance in bacterial  
75 populations (Cabello et al., 2013; Kesarcodi-Watson et al., 2008); furthermore, prophylactic  
76 treatments, such as vaccines and probiotics, are either not feasible or not yet commercially  
77 available for molluscan aquaculture (Pérez-Sánchez et al., 2018). This is in contrast to the many  
78 probiotic products used in crustacean and finfish aquaculture (reviewed by El-Saadony et al.,  
79 2021).

80 The definition of probiotics has been expanded in aquatic environments to reflect that they are  
81 not solely antagonists of pathogens, but also can interact positively with both the environment  
82 and their hosts. Verschuere et al., (Verschuere et al., 2000) for example, state "[...] a probiotic is  
83 defined as a live microbial adjunct which has a beneficial effect on the host by modifying the  
84 host-associated or ambient microbial community, by ensuring improved use of the feed or  
85 enhancing its nutritional value, by enhancing the host response towards disease, or by  
86 improving the quality of its ambient environment".

87 Included in this definition are probiotic-induced modifications of the microbial community that  
88 affect host life stages known to be influenced by microbial cues. Bivalves undergo  
89 metamorphosis and settlement, where they permanently transition from planktonic larvae to  
90 sessile juveniles referred to as spat. Metamorphosis often results in high mortality (Durland et

91 al., 2019; Jorquera et al., 2001). Some biofilms (Campbell et al., 2011; Devakie & Ali, 2002;  
92 Rodriguez-Perez et al., 2019; Tritar et al., 1992; Wieczorek & Todd, 1998; Zhao et al., 2003),  
93 individually added bacterial isolates (Freckelton et al., 2017), and bacterial supernatants (W. K.  
94 Fitt et al., 1990; William K. Fitt et al., 1989; Walch et al., 1999) improve larval oyster  
95 metamorphosis, while others result in inhibitory effects (Devakie & Ali, 2002; Dobretsov et al.,  
96 2006). Therefore, studies on the use of probiotics in bivalve aquaculture should include their  
97 effects on larval settlement and metamorphosis.

98 This study aimed to develop a combination of beneficial probiotic bacterial isolates that  
99 reduced acute mortalities of early larvae of Pacific oysters (*Crassostrea gigas*) resulting from  
100 exposure to pathogenic *V. coralliilyticus* strain RE22. We further evaluated whether single or  
101 repeated probiotic additions resulted in longer-term benefits to larval growth and  
102 metamorphosis of Pacific oysters. Lastly, we determined the effect of a single dose of the  
103 combined probiotics on metamorphosis of the Miyagi and Midori strains of the Pacific oyster as  
104 well as the Kumamoto oyster (*Crassostrea sikamea*).

105

## 106 **2. Methods**

### 107 **2.1. Isolation and initial screening of probiotic candidates**

108 All experiments were conducted at Oregon State University's facilities, including the research  
109 hatchery at the Hatfield Marine Science Center (HMSC) in Newport, Oregon, USA. Over 311  
110 bacterial isolates were collected from water samples, microalgae tanks, oyster feces, mantle,  
111 gills, the gastrointestinal tracts of healthy adult bloodstock and cultures of juvenile spat and

112 larvae of Pacific oysters (*C. gigas*) from the HMSC research hatchery. Additional samples also  
113 originated from a commercial hatchery in Netarts Bay, Oregon, and an oyster farm in Yaquina  
114 Bay, Oregon. The final probiotic candidates originated from the following samples: *C. gigas* spat  
115 that survived a naturally occurring mortality event (D16 and DM14) and gastrointestinal swabs  
116 from adult *C. gigas* (B1 and B11). Isolates were enriched in culture broth before being streaked  
117 on agar plates of modified, seawater-based Luria-Bertani agar (LBSw; 10 g of tryptone, 5 g of  
118 yeast extract, and 15 g agar per liter of filtered seawater) and incubated at 25 °C for at least 24  
119 hours. Plated colonies selected for further screening were grown in LBSw broth (10 g of  
120 tryptone, 5 g of yeast extract per liter of filtered seawater) and agitated at 25 °C and 40 RPM on  
121 a roller drum (New Brunswick TC-7; New Brunswick Scientific, USA) for 16 to 24 hours. Isolates  
122 were cryopreserved in 15% glycerol and stored at -80 °C until further use. All seawater used for  
123 bacterial culture was filtered (1 µm, Pentair, Golden Valley, MN) and autoclaved.

124  
125 Isolates were first screened for their ability to inhibit the growth of *V. coralliilyticus* strains RE22  
126 (Richards et al., 2021) and RE98 (Richards et al., 2014) on LBSw agar plates. Freezer stocks were  
127 re-streaked onto LBSw-agar plates and incubated at 25 °C for 24 hours. One colony of each  
128 candidate was inoculated into LBSw broth and grown with agitation for at least 24 hours. Five µl  
129 of the overnight candidate culture were then dropped onto fresh lawns of approximately 10<sup>4</sup>  
130 CFU of *V. coralliilyticus* RE22 and/or RE98. These 10 cm-diameter LBSw-agar plates were  
131 incubated overnight at 25 °C before being checked for zones of inhibition between the probiotic  
132 candidates and *V. coralliilyticus*. In addition, putative probiotic candidates were screened on  
133 *Vibrio*-selective Thiosulfate Citrate Bile Salt Sucrose (TCBS; Becton Dickinson or Sigma-Aldrich,

134 USA) agar to identify and exclude *Vibrio* spp. during this initial screening process (project  
135 workflow in S1 Figure).

136

## 137 **2.2. Culture of probiotic bacterial isolates and the pathogen *Vibrio*** 138 ***coralliilyticus* strain RE22 for use in oyster larval assays**

139 Fresh cultures of bacteria were prepared from cryopreserved samples for every oyster larval  
140 experiment. *V. coralliilyticus* strain RE22 was used for all experiments in this study. This strain  
141 was isolated from a commercial shellfish hatchery in the Pacific Northwest and is highly  
142 pathogenic, often resulting in larval mortalities of 100% at 26 °C (Estes et al., 2004). All  
143 probiotic candidates that remained in the evaluation after the initial screening were grown as  
144 described above. The bacteria were then washed twice via centrifugation at 3900 x g,  
145 resuspended in autoclaved seawater, and the optical density (OD) measured at 600 nm with a  
146 spectrometer (Beckman DU 530). The cultures were then diluted with autoclaved seawater to a  
147 final concentration in the larval culture water of  $6 \times 10^3$  CFU/mL for *V. coralliilyticus* and  $1 \times 10^4$   
148 CFU/mL for each probiotic candidate unless otherwise specified.

149

## 150 **2.3. Production of Pacific oyster (*C. gigas*) and Kumamoto oyster (*C.*** 151 ***sikamea*) D-larvae**

152 Oyster broodstock was conditioned and strip-spawned to collect gametes (Langdon et al.,  
153 2003). The eggs were fertilized and incubated at a density of 50 to 100 eggs/mL in 30 L  
154 containers filled with seawater at 25 °C,  $32 \pm 2$  ppt salinity, and pH of  $8.2 \pm 0.1$ . All seawater



155 was pumped from the Yaquina Bay, Newport, passed through 10  $\mu\text{m}$  bag filters, and aerated  
156 with soda lime air overnight to adjust the pH. In the experiments described in 2.4. and 2.5., the  
157 larvae were hatched in autoclaved seawater with 2  $\mu\text{g}/\text{mL}$  chloramphenicol and 10  $\mu\text{g}/\text{mL}$   
158 ampicillin. For the experiment described in 2.7, gametes were collected aseptically using  
159 ethanol for gonad surface-disinfection and sterile instruments (Douillet & Langdon, 1993), and  
160 the incubation seawater was autoclaved.

161 After incubation, one-day-old (24 hours post-fertilization; hpf) D-larvae were collected on a 45  
162  $\mu\text{m}$  sieve and thoroughly rinsed with sterile seawater. Larvae from different parental crosses  
163 were pooled in equal proportions and then distributed among culture containers at a density of  
164 5 to 35 larvae per mL. The culture containers varied from 1 mL to 30 L depending on the type of  
165 assay. Twenty-four hpf D-larvae were used in all the infection assays.

166

## 167 **2.4. Screening putative probiotic candidates for potential** 168 **pathogenicity against *C. gigas* (Miyagi stock) larvae using well-plate** 169 **assays**

170 Probiotics were tested for pathogenicity as described by Estes et al. (Estes et al., 2004), with  
171 minor modifications. A suspension of 24 hpf D-larvae was diluted to 35 larvae per mL with 10  
172  $\mu\text{m}$ -filtered and autoclaved seawater, and one mL of the larval suspension was added to each  
173 well of 24-well plates (Corning, USA). Candidate probiotics were each added at a concentration  
174 of  $3 \times 10^4$  CFU/mL. Each treatment was replicated six times. After 48 hours of incubation at 25  
175  $^{\circ}\text{C}$ , larvae were preserved in their wells with 0.1% (v/v) buffered formalin (pH 8.2). Live and

176 dead larvae were counted by light microscopy (Leica DMIL LED inverted microscope, x10  
177 objective). Tissues of dead larvae degraded rapidly, facilitating differentiation between live and  
178 dead larvae. If greater than 90% of tissue remained within the shells, the larvae were classified  
179 as having been alive. If less than 90% of tissue remained, the larvae were classified as having  
180 been dead before formalin-preservation (Madison et al. 2022).

181  
182 Each assay in this study contained a larvae-only negative control, which did not receive any  
183 bacteria and was used to normalize larval mortalities that were unrelated to experimental  
184 treatments. This control enabled calculation of relative percent survival (RPS). RPS was  
185 calculated as  $RPS = [1 - (\text{percent mortality of treatment group} / \text{percent mortality of untreated}$   
186  $\text{control group})] \times 100$ . In addition, positive controls were included with larvae that were  
187 exposed to *V. coralliilyticus* without addition of probiotics.

188

## 189 **2.5. Screening putative probiotic candidates for protection of *C. gigas*** 190 **(Miyagi stock) larvae against *V. coralliilyticus* strain RE22 using well-** 191 **plate assays**

192 Protective activities of the probiotic candidates were determined in well-plate assays by adding  
193 the probiotic candidates ( $3 \times 10^4$  CFU/mL final probiotic concentration) to 24 hpf D-larvae in  
194 sterile seawater, followed at 48 hpf by addition of *V. coralliilyticus* strain RE22 at a  
195 concentration of  $6 \times 10^3$  CFU/mL. The larvae were then incubated at 25 °C for 48 hours, after  
196 which time they were preserved with 0.1% buffered formalin. Live and dead preserved larvae

197 were observed and counted by light microscopy (Leica DMIL LED inverted microscope, x10  
198 objective).

199

## 200 **2.6. Identification of probiotic candidates by 16S rRNA gene**

### 201 **sequencing**

202 Genetic identification of the candidate probiotics D16, DM14, B1, and B11 was conducted by  
203 16S RNA gene sequencing and the NCBI's BLAST suite (Altschul et al., 1990). DNA was extracted  
204 using phenol:chloroform extraction from one mL of overnight culture according to published  
205 protocols with the slight modification that after the final thaw during the RNase step, 20 µg/mL  
206 RNase A was added, and samples were incubated at 34°C for 30 min (Crump et al., 2003).

207 Amplification of the 16S rRNA gene from each genome was performed under standard PCR  
208 conditions with the forward primer 8F 5'-AGAGTTTGATCCTGGCTCAG and the reverse primer  
209 1513R 5'-ACGGCTACCTTGTTACGACTT amplifying an approximately 1500 bp piece of DNA.  
210 Dideoxy sequence reads were generated from the cleaned PCR product using the same primers.  
211 The forward and reverse sequence reads were assembled and trimmed, and the resulting  
212 consensus sequence was then queried against the NCBI's 16S ribosomal RNA sequence  
213 database using BLASTN (Altschul, 1990).

214

## 215 **2.7. Developing a probiotic combination treatment using well-plate**

### 216 **assays**

217 Promising candidates were tested in combinations to potentially take advantage of combining  
218 different probiotic modes of action. Each probiotic test well was filled with a one mL suspension  
219 of approximately 35 one-day-old (24 hpf) D-larvae and probiotic isolates (B11, DM14, and D16)  
220 in sterile seawater. These probiotics were tested individually or combined in equal  
221 concentrations of two or three probiotics to achieve final total probiotic concentrations of  $3 \times$   
222  $10^4$  CFU/mL. At 48 hpf, the probiotic-treated larvae were challenged with *V. coralliilyticus* strain  
223 RE22 and incubated until 96 hpf. A positive control consisted of larvae with additions of *V.*  
224 *coralliilyticus* alone (*Vcor* only). Lastly, a negative control was included that consisted of larvae  
225 that did not receive probiotics nor *V. coralliilyticus* (Larvae only). At 96 hpf, larvae were  
226 preserved with the addition of buffered formalin and live and dead larvae were counted, as  
227 described above.

228

## 229 **2.8. Effects of the probiotic combination on growth, settlement and** 230 **metamorphosis of *C. gigas* (Miyagi stock) larvae in a long-term assay**

### 231 **2.8.1. Larval culture and experimental treatments**

232 Larvae (24 hpf) were stocked at a concentration of five larvae per mL in 10-L containers filled  
233 with 10  $\mu$ m-filtered seawater, with five replicates per treatment group. One treatment group  
234 received probiotics added to the larval culture water once at 24 hpf (Single PB Addition). The  
235 other treatment group received probiotics following water changes every 48 hours (Multiple PB  
236 Additions). A control treatment of larvae alone (Larvae Only), without additions of probiotics,  
237 was also included.

238

239 Probiotics were prepared as previously described but were applied to the 10-L cultures at a  
240 concentration of  $6 \times 10^4$  CFU/mL each, resulting in a total combination treatment of  $1.8 \times 10^5$   
241 CFU/mL. The first water change occurred 72 hours after stocking the larvae, then every 48  
242 hours after that. During water changes throughout this experiment, larvae were poured over a  
243 45  $\mu\text{m}$  screen to avoid removing slow-growing larvae. Larvae were rinsed with 10  $\mu\text{m}$ -filtered  
244 seawater at each water change. As part of the water change, the containers were scrubbed  
245 with 0.02% (v/v) Vortexx (Ecolab, USA) and thoroughly rinsed with hot tap water. In addition,  
246 the airlines were rinsed with tap water before the containers were refilled with fresh seawater.  
247 Metamorphosis success was determined on 20, 22 and 24 dpf.

248

249 Larvae were cultured according to established methods (Langdon et al., 2003). Briefly, larvae  
250 were fed during the first six days on an algal diet of the flagellate *Tisochrysis lutea* (strain C-ISO)  
251 at  $4 \times 10^4$  cells/mL. On day seven, the diet was modified to include a 50/50 mixture (by cell  
252 concentration) of C-ISO and the diatom *Chaetoceros gracile* and the total cell concentration was  
253 increased to 50,000 cells/mL and then further increased to 80,000 cells/mL on day twelve.

254

### 255 **2.8.2. Larval growth**

256 Random larval sub-samples were collected from the 10-L containers on day 8 and transferred to  
257 24-well plates in an attempt to carry out a challenge assay with larvae exposed to *V.*  
258 *coralliilyticus* over a four-day period. This assay failed because no mortalities were observed in  
259 any treatments or the positive control (Vcor only) (data not presented). Control larvae from

260 wells that were not exposed to *V. coralliilyticus* RE22 were sampled on day 12, preserved with  
261 0.1% phosphate-buffered formalin (pH 8.2), and photographed at 40X objective magnification  
262 (Leica DMIL LED inverted microscope; Leica DFC400 camera; Leica Application Suite 4.8 Leica,  
263 Germany). Over 350 larvae were measured from each treatment. Shell lengths (defined as the  
264 greatest dimension parallel to the shell hinge) of larvae were measured using the software  
265 Image Pro Premier 9 (Media Cybernetics, USA).

266

### 267 **2.8.3. Larval settlement and metamorphosis**

268 Sixteen days post-fertilization (dpf), 4 x 4-inch marble tiles were added to each 10-L container,  
269 and larvae larger than 240  $\mu\text{m}$  began setting naturally. On 20 dpf, the marble tiles were  
270 removed and photographed. The settled larvae on each tile were counted using the imaging  
271 analysis software Image Pro Premier 9 (Media Cybernetics, USA). In addition, larvae set on the  
272 buckets and airlines were counted manually during each water change. Spat that set on the  
273 buckets, beakers, and airlines as well as spat that settled on tiles were categorized as naturally  
274 set.

275

276 After removing the tiles containing the spontaneously settled larvae,  $2 \times 10^{-4}$  M epinephrine  
277 (Epi) was used to induce the metamorphosis of remaining larvae on days 20, 22, and 24 (Coon  
278 et al., 1986). Non-metamorphosing larvae were returned to their culture containers on days 20  
279 and 22. Any larvae that had not metamorphosed after exposure to epinephrine on day 24 were  
280 counted as larvae. Larvae that metamorphosed were moved to a flow-through upweller  
281 system, where they were cultured until 30 dpf to allow production of additional shell growth

282 These spat were categorized as successfully metamorphosed with epinephrine, preserved in  
283 0.1% phosphate-buffered formalin (pH 8.2), and counted.

284

285 **2.9. Effects of the probiotic combination on larval settlement and**  
286 **metamorphosis of the Miyagi and Midori stocks of the Pacific oyster**  
287 **(*Crassostrea gigas*) and the Kumamoto oyster (*Crassostrea sikamea*)**  
288 **in long-term assays**

289 The experiment described above (section 2.8) was repeated with larvae of two different stocks  
290 of the Pacific oyster - the commonly farmed Miyagi stock and the newly introduced Midori  
291 stock (de Melo et al., 2021), as well as larvae of the Kumamoto oyster. The experimental  
292 conditions were similar to those described above; however, there were several differences: 1)  
293 the larvae were raised in 30 L of seawater, and the first water change occurred 48 hours after  
294 stocking the larvae, 2) live *Nannochloropsis occulata* (Nanno) cells were added to the C-ISO diet  
295 on days two to six, 3) the algal diet was checked daily and, if the larvae had consumed all food,  
296 the total cell concentration of the algal diet was increased by 5000 cells/mL from an initial  
297 concentration of 35000 cells/mL C-ISO, and 15000 cells/mL Nanno and, 4) larval densities were  
298 intentionally reduced during the experiment to be more similar to culture practices of  
299 commercial oyster hatcheries where slow-growing larvae are routinely discarded by sieving  
300 (Barton et al. 2012).

301

302 Larvae were initially stocked at five larvae per ml of seawater, as in the long-term Pacific oyster  
303 assay described above. Slow-growing larval *C. gigas* were removed from the cultures if they  
304 were not retained on a 64  $\mu\text{m}$ -screen on day 7 or on an 80  $\mu\text{m}$ -screen on day 9. Larval *C.*  
305 *sikamea* are smaller than larval *C. gigas*; therefore, larvae that were not retained a 64  $\mu\text{m}$ -  
306 screen were removed later on day 9. After removing all slow-growing larvae, the remaining  
307 larvae were reduced to a density of one larva per ml on day 9. Slow-growing larvae that were  
308 subsequently not retained on a 180  $\mu\text{m}$ -screen on day 17 were removed. Larvae grew faster in  
309 this experiment, so the tiles were added on day 15 and removed on day 17 post-fertilization.  
310 Subsequently, three rounds of epinephrine were used to induce metamorphosis on days 17, 19,  
311 and 21 post-fertilization.

312

## 313 **2.10. Statistical analyses**

314 Data from larval survival assays was converted to relative percent survival (RPS), using the  
315 calculation described previously. Relative percent survival was arcsine-square-root transformed  
316 prior to analysis. Statistical analyses were conducted using R statistical software (Version 4.0.3,  
317 R Project for Statistical Computing). Graphs were generated using the ggplot2 R package.  
318 Normality was assessed using the Shapiro-Wilk test and Q-Q plots. Homogeneity of variance  
319 was assessed using Levene's test from the car.R package. When no significant violations of the  
320 assumptions of parametric tests were observed, multiple comparisons of treatment group  
321 means against control groups were conducted using Dunnett's test, with the nCDunnett R  
322 package. When multiple comparisons between all treatment group means were of interest,  
323 data was first fitted to a linear model, then a one-way analysis of variance was conducted to



324 determine if significant differences between treatment groups existed. If significant differences  
325 existed, Tukey's honest significant difference test was applied to obtain pairwise comparisons  
326 of treatment groups.

327  
328 When significant deviations from the assumptions of parametric tests were observed in data  
329 sets, nonparametric methods were used for statistical analyses. For non-parametric multiple  
330 comparisons of treatment groups, the Kruskal-Wallis one-way analysis of variance was  
331 conducted to determine if significant differences between treatment groups existed. Pairwise  
332 comparisons between treatment groups were then conducted using Dunn's test with the  
333 Benjamini-Hochberg correction applied, from the dunn.test R package.

334  
335 For data with no significant violations of normality, comparisons between only two treatment  
336 group means were conducted using a two-sample t-test. When heterogeneity of variance  
337 between both treatment groups was observed, Welch's two-sample t-test was applied to  
338 compare treatment group means. Comparisons between two treatment groups where the data  
339 showed significant violations of normality were conducted using the Mann-Whitney U test.

340

## 341 **3. Results**

### 342 **3.1. Initial screening of probiotic candidates**

343 From all microbial strains collected for probiotic screening, approximately 28.3% were not  
344 revivable after freeze-thawing or failed to sufficiently grow in LBSw within 48 hours, 36.7%

345 grew on TCBS agar and were consequently excluded, leaving 45% screened on agar plates  
346 against *V. coralliilyticus* strain RE22. Ultimately 13 strains were suggestive of contact inhibition  
347 or zones of clearing on the *V. coralliilyticus* lawn. These strains proceeded to pathogenicity  
348 testing with oyster larvae (project workflow in S1 Figure).

349

### 350 **3.2. Screening putative probiotic candidates for potential** 351 **pathogenicity against *C.gigas* (Miyagi stock) larvae using well-plate** 352 **assays**

353 Putative probiotic candidates DM7, DM36, DM39, and D20 passed the agar inhibition test, but  
354 when added to larvae 24 hpf, caused a reduced survival that was statistically lower than that of  
355 the non-probiotic control (Larvae Only). As a result, these candidates were excluded from  
356 further evaluation (S1 Table).

357

### 358 **3.3. Screening putative probiotic candidates for protection of *C. gigas*** 359 **(Miyagi stock) larvae against *V. coralliilyticus* strain RE22 using well-** 360 **plate assays**

361 The highly virulent *V. coralliilyticus* strain RE22 was added to two-day-old larvae (48 hpf) in well  
362 plate assays, at a concentration of  $6 \times 10^3$  CFU/mL 24 hours after probiotic additions at  $3 \times 10^4$   
363 CFU/mL. The positive control (Vcor only) did not receive any probiotics and resulted in almost

364 complete larval mortality, reducing the relative percent survival to an average of 3.40% (Figure  
365 1).

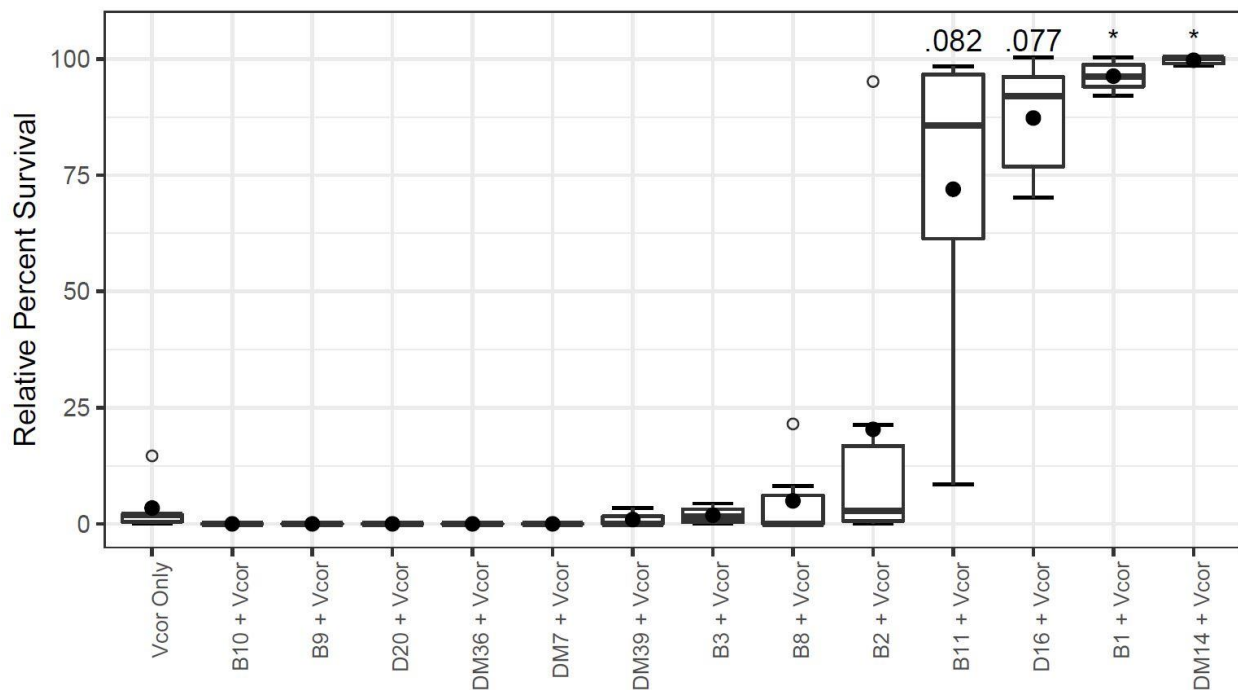

366 **Figure 1: *C. gigas* larvae were protected against *V. coralliilyticus* RE22 (Vcor) with probiotic candidates**  
367 **B11, D16, B1, and DM14.** Probiotic candidates were evaluated in well-plate assays with 24 hpf-old *C.*  
368 *gigas* larvae. “Vcor Only” was the positive control with no additions of probiotics but was inoculated  
369 with *V. coralliilyticus* 48 hpf. A negative control did not receive any probiotics or pathogen and was used  
370 to normalize mortalities that were not related to pathogen or probiotic treatments to calculate relative  
371 percent survival (RPS) values. Filled circles depict the average relative percent survival of six replicate  
372 wells. The boxes indicate the upper and lower quartiles, and the bar represents the median or middle  
373 quartile. The ends of the whiskers represent the most extreme values within the 1.5x interquartile range  
374 (IQR), and the empty circles indicate outliers. Only the treatments using the probiotic candidates B11,  
375 D16, B1, and DM14 yielded more than 68% improved average RPS, compared to the positive control  
376 (Vcor Only). However, statistical analysis using Dunn’s Test with a Benjamini-Hochberg Correction  
377 resulted in no (D16  $P=.077$ ; B11  $P=.082$ ) or low (B1/DM14  $.05 > P > .01$ ; indicated with asterisks)  
378 statistically significant differences between larval survival with the probiotic treatments and the “Vcor  
379 Only” control, due to the high variance of some of the treatments (S2 Table).  
380

381  
382 Of the 13 remaining candidates tested in this experiment, additions of the four probiotic  
383 candidates DM14, B1, D16, and B11 each resulted more than a 68% increase in mean RPS  
384 compared to that with the positive *V. coralliilyticus* control (Vcor Only) (S2 Table). Treatments

385 with DM14 or B1 resulted in minimal larval losses and an average survival of  $99.71 \pm 0.87\%$  and  
386  $96.29 \pm 3.30\%$ , respectively (S2 Table). In contrast, larvae treated with D16 or B11 showed high  
387 variabilities in survival among replicates (S3 Table). Larvae treated with D16 had a slightly  
388 reduced survival in two replicate wells (71.8% and 70%), but high survival in the remaining four  
389 test wells leading to a mean RPS of  $87.28 \pm 12.96\%$  (S2 and S3 Tables). Lastly, larvae treated  
390 with B11 had high survival in three wells (95.31%, 96.77%, 98.15%), moderate in two wells  
391 (56.4% and 75.47%), and a low survival of 8.5% in one well, leading to a mean RPS of  $71.96 \pm$   
392  $35.10\%$  (S2 and S3 Tables). Repeated trials, including the use of different seawater sources  
393 (data not shown) did not reduce inter-replicate variabilities observed for all probiotic  
394 candidates. Probiotic candidates were, therefore, advanced to further testing when mean RPS  
395 values were at least 40%, regardless of whether a statistical significance of  $P < .05$  was achieved.  
396 The addition of candidates B2, B3, B8, B9, B10, DM7, DM36, DM39, and D20 did not result in an  
397 40% improved mean RPS compared to the positive control (Vcor Only), and these isolates were  
398 consequently excluded from further testing (S2 Table).

399

### 400 **3.4. Identification of the probiotic candidates by 16S rRNA gene**

#### 401 **sequencing**

402 After the screening of the putative probiotics against *V. coralliilyticus* in larval assays, promising  
403 probiotic candidates were submitted to 16S rRNA sequencing. BLASTN suite search identified  
404 D16 and DM14 as different *Pseudoalteromonas* spp., and B11 as an *Epibacterium* sp. Finally,  
405 isolate B1 was identified as a *Vibrio* sp. and was consequently excluded at this stage.

406

### 407 3.5. Developing a probiotic combination treatment using well-plate

#### 408 assays

409 Individual or combination treatments of the candidate probiotics B11, D16, and DM14 were

410 evaluated for their ability to reduce larval mortalities due to *V. coralliilyticus* and to decrease

411 variability among replicates (Figure 2).

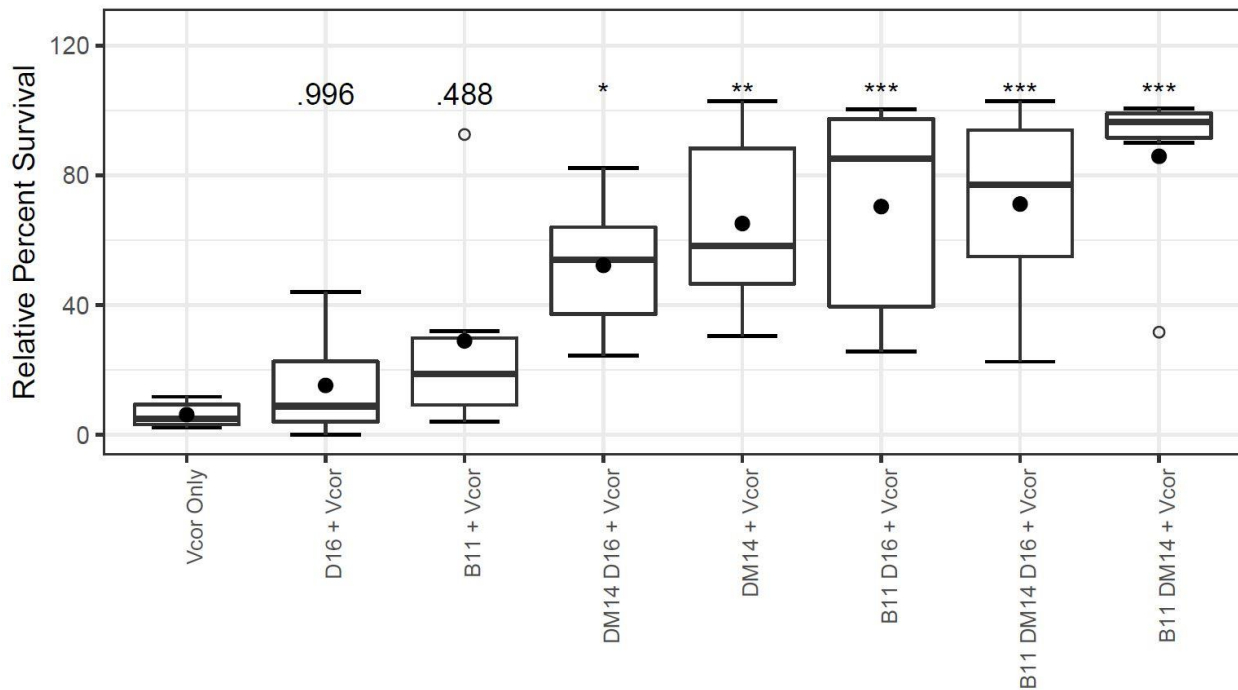

412

413 **Figure 2: Relative percent larval survival with individual or combination probiotic treatments against**

414 ***V. coralliilyticus* strain RE22 for 1-day-old D-larvae of *C. gigas*.** Individual or combinations of

415 probiotics were evaluated for their ability to decrease larval mortalities due to *V. coralliilyticus*.

416 “Vcor Only” was the positive control that did not receive any probiotics. Filled circles depict the

417 average relative percent survival of six replicate wells. The boxes indicate the upper and lower

418 quartiles, and the bar represents the median or middle quartile. The ends of the whiskers

419 represent the most extreme values within the 1.5x interquartile range (IQR), and the empty

420 circles indicate outliers. \*, \*\* and \*\*\* indicate statistical differences from “Vcor Only” at  $P \leq .05$ ,

421  $P \leq .01$ , and at  $P \leq .001$ , respectively.

422

423 Oyster larvae, that did not receive any probiotics 24 hpf but were challenged with *V.*  
424 *coralliilyticus* 48 hpf, showed a low relative percent survival (RPS) averaging 6.23% across the  
425 six replicate wells (S5 Table). Individual applications of D16 and B11 did not increase the mean  
426 RPS of the larvae compared to the positive control (Vcor only) (15.24%;  $P=.996$ ) and (28.98%;  
427  $P=.488$ ), respectively. Only the individual probiotic candidate DM14 significantly increased the  
428 mean RPS (65.17%;  $P=.003$ ). However, when D16 and B11 were combined the mean RPS was  
429 64.17% higher than the positive control ( $P=.001$ ), and combining DM14 and D16 resulted in a  
430 46.05% improvement ( $P=.034$ ). Combining B11 and DM14 achieved a mean RPS of 85.88%  
431 ( $P<.001$ ); however, one of the replicates was categorized as an outlier (RPS of 31.67%; data not  
432 shown). The three-strain combination resulted in a mean RPS of 71.18% ( $P=.001$ ) (S5 Table).  
433 Overall when the results of the individual, two-strain, and three-strain combinations were  
434 combined (S2 Figure), there was no statistical significance of the single strain additions  
435 compared to the positive control ( $P=.085$ ). The effects of the two- and the three-strain  
436 combinations were similar to each other ( $P=.999$ ) but significantly different from that of the  
437 Vcor only control (S6 Table).

438

### 439 **3.6. Effects of the probiotic combination on growth, settlement and** 440 **metamorphosis of *C.gigas* (Miyagi stock) larvae in long-term assays**

#### 441 **3.6.1. Larval growth**

442 Larvae from the five replicate control containers that did not receive any probiotic treatment  
443 had an average shell size of  $153.21 \pm 28.52 \mu\text{m}$ , which was significantly smaller than those of

444 the treatment groups that received either a single dose or multiple doses of probiotics  
 445 (Dunnett's Test,  $P \leq .001$ ) (Table 1). The treatment group that received repetitive probiotic doses  
 446 after each water change had an average shell size of  $161.24 \pm 30.89 \mu\text{m}$ , and the treatment  
 447 group that received a single probiotic addition 24 hpf resulted in a value statistically similar to  
 448 the repetitive dosing treatment ( $P = .258$ ), but with slightly greater average shell length of  
 449  $164.49 \pm 30.81 \mu\text{m}$  (Table 1) (S3 Figure).

450

451 Table 1: Average shell lengths of *C. gigas* (Miyagi stock) larvae after probiotic treatments.

| <b>Dunnett's Test (comparing to Larvae Only control)</b>         |                                                     |                           |                   |                                     |                    |
|------------------------------------------------------------------|-----------------------------------------------------|---------------------------|-------------------|-------------------------------------|--------------------|
| <b>Treatment</b>                                                 | <b>Mean shell Length (<math>\mu\text{m}</math>)</b> | <b>Standard Deviation</b> | <b>Difference</b> | <b>95% Confidence Interval (CI)</b> | <b>p-value</b>     |
| Single PB Addition                                               | 164.49                                              | 30.81                     | 11.28             | (6.57, 16.00)                       | <b>&lt;.001***</b> |
| Multiple PB Additions                                            | 161.24                                              | 30.89                     | 8.03              | (3.15, 12.92)                       | <b>.001***</b>     |
| Larvae Only                                                      | 153.21                                              | 28.52                     |                   |                                     |                    |
| <b>Tukey-Kramer (pairwise comparisons between PB treatments)</b> |                                                     |                           |                   |                                     |                    |
|                                                                  | <b>Pairwise Comparison</b>                          | <b>Difference</b>         | <b>95% CI</b>     | <b>p-Value</b>                      |                    |
|                                                                  | PB Multiple - PB Single                             | -3.25                     | (-8.09, 1.60)     | .258                                |                    |

452 \*\*\* indicates  $P \leq .001$

453

### 454 3.6.2. Larval settlement and metamorphosis

455 Spat were categorized as undergoing successful metamorphosis when they survived until 30  
456 dpf, i.e., for at least six days after settlement or addition of epinephrine. An average of 2.24% of  
457 larvae in the control treatment group that did not receive any probiotics naturally set on the  
458 marble tiles and surfaces of the culture container (Figure 3) (S7 Table). The remaining larvae  
459 exposed to epinephrine displayed a successful metamorphosis rate of 4.81%, resulting in a  
460 combined metamorphosis rate of 7.06%. A one-time probiotic addition at 24 hpf resulted in  
461 8.29% natural settlement and metamorphosis. When epinephrine was added to the remaining  
462 larvae, 13.03% metamorphosed, resulting in a combined metamorphosis rate of 21.32% that  
463 was significantly higher than that of the control without addition of probiotics ( $P=.004$ ).  
464 Repeated dosing of the probiotic combination after each water change resulted in a successful  
465 settlement and metamorphosis rate of 2.8% of larvae on marble tiles. The addition of  
466 epinephrine yielded a metamorphosis rate of 4.24%, resulting in a total metamorphosis rate of  
467 7.04%, which was not significantly different from the “Larvae Only” control ( $P>.999$ ) (S7 Table).



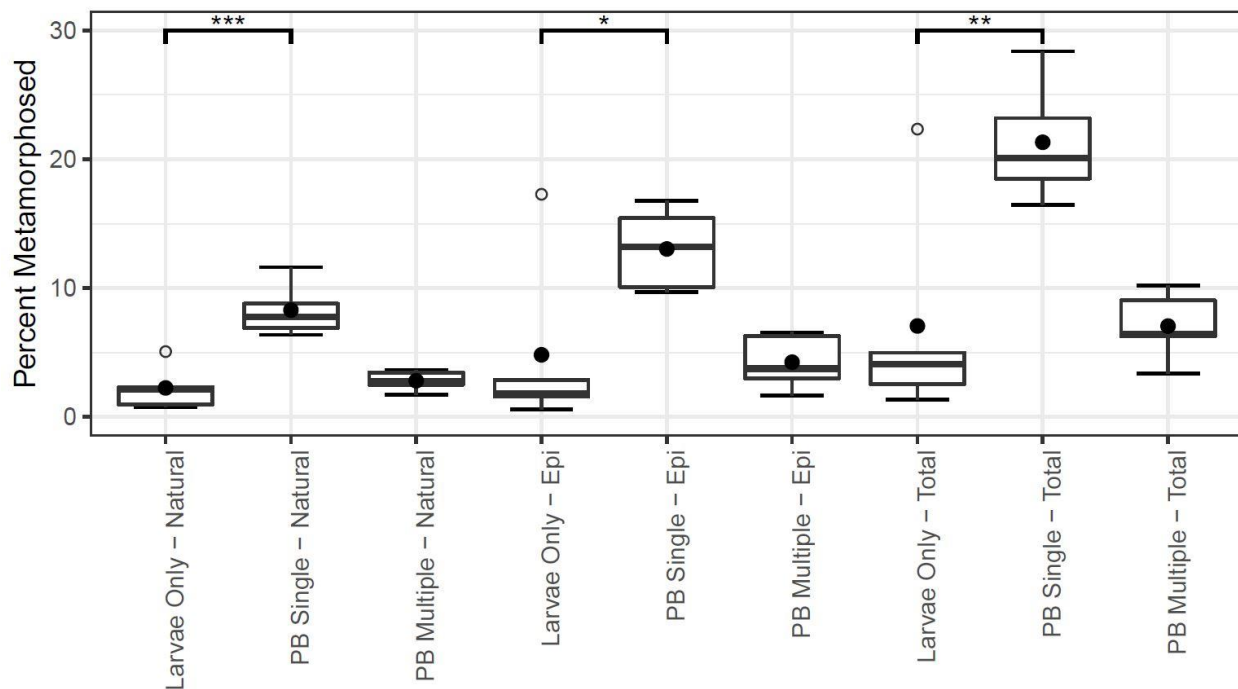

468

469 **Figure 3: Single application of the probiotic (PB Single) improved settlement and**  
470 **metamorphosis of *C. gigas* (Miyagi stock) larvae.** A single dose of the probiotic combination (PB  
471 Single) 24 hpf significantly improved successful metamorphosis of naturally set ( $P < .001^{***}$ ) and  
472 epinephrine-treated ( $P = .028^*$ ) *C. gigas* larvae, resulting in significantly improved total  
473 metamorphosis ( $P = .004^{**}$ ), compared with the control with no probiotic additions.  
474 Metamorphosis success with repeated probiotic applications (PB Multiple) did not differ from  
475 that of control larvae (Larvae Only) ( $P > .999$ ) (S7 Table). Filled circles depict the average relative  
476 percent survival of five replicate 10-L containers. The boxes indicate the upper and lower  
477 quartiles, and the bar represents the median or middle quartile. The ends of the whiskers  
478 represent the most extreme values within the 1.5x interquartile range (IQR), and the empty  
479 circles indicate outliers.

480

### 481 **3.7. Effects of the probiotic combination on larval settlement and** 482 **metamorphosis of *C. gigas* (Miyagi and Midori stocks) and *Crassostrea*** 483 ***sikamea* (Kumamoto) in long-term assays**

484 The addition of a single dose of the B11, DM14, D16 probiotic combination 24 hpf increased the  
485 percentage of larvae that metamorphosed successfully in Miyagi and Midori stocks of *C. gigas*

486 as well as the Kumamoto oyster ( $P \leq .02$ ) (Table 2). Because the larval density was reduced to  
 487 one larva per mL on day nine post-fertilization, the percent metamorphosed was based on the  
 488 number of larvae restocked on that day.

489

490 Table 2: Settlement and metamorphosis of larvae from two stocks of *C. gigas* (Miyagi and  
 491 Midori) and the Kumamoto oyster (*C. sikamea*) were improved with a single addition of  
 492 probiotics at 24 hpf.

| Oyster species/stocks | Treatment     | Natural Set Avg. % ( $\pm$ %STDEV) | Metamorphosis with Epi Avg. % ( $\pm$ %STDEV) | Total Metamorphosed Avg. % ( $\pm$ %STDEV) | Two-sample t-test $p$ -value <sup>b</sup> |
|-----------------------|---------------|------------------------------------|-----------------------------------------------|--------------------------------------------|-------------------------------------------|
| Miyagi <sup>a</sup>   | w/ probiotics | 24.02 ( $\pm$ 11.18)               | 55.74 ( $\pm$ 10.51)                          | 79.76 ( $\pm$ 6.03)                        | .020                                      |
| Miyagi <sup>a</sup>   | no probiotics | 20.89 ( $\pm$ 6.18)                | 43.21 ( $\pm$ 8.38)                           | 64.10 ( $\pm$ 10.41)                       |                                           |
| Midori                | w/ probiotics | 22.21 ( $\pm$ 11.82)               | 34.46 ( $\pm$ 6.54)                           | 56.67 ( $\pm$ 6.37)                        | .015                                      |
| Midori                | no probiotics | 15.34 ( $\pm$ 2.44)                | 29.36 ( $\pm$ 7.42)                           | 44.70 ( $\pm$ 5.81)                        |                                           |
| Kumamoto              | w/ probiotics | 26.18 ( $\pm$ 3.79)                | 31.72 ( $\pm$ 4.99)                           | 57.90 ( $\pm$ 4.04)                        | .004                                      |
| Kumamoto              | no probiotics | 21.31 ( $\pm$ 2.82)                | 24.82 ( $\pm$ 4.20)                           | 46.14 ( $\pm$ 5.03)                        |                                           |

493 <sup>a</sup>Miyagi is the stock name of the commonly cultured Pacific oyster (*C. gigas*) on the US West  
 494 coast, while the Midori stock was introduced to the US West coast in the early 2000s (de Melo  
 495 et al., 2021); <sup>b</sup>Two-sample t-tests were conducted on the total ratios of set larvae. All other t-  
 496 tests in S8 Table.

497

### 498 3.7.1. Effects on *C. gigas* Miyagi stocks

499 Larvae in the control treatment group that did not receive any probiotics showed a rate of  
 500 20.89% natural settlement and metamorphosis on marble tiles (S4 Figure). Non-settled larvae

501 were then treated with epinephrine and 43.21% underwent successful metamorphosis. The  
502 subsequent total metamorphosis of larvae without any probiotics was 64.1%. A one-time  
503 probiotic addition 24 hpf resulted in 24.02% natural settlement. When epinephrine was added  
504 to the remaining larvae, 55.74% metamorphosed, resulting in a combined metamorphosis rate  
505 of 79.76% that was significantly higher than total metamorphosis without addition of probiotics  
506 ( $P=.020$ ) (Table 2).

507

### 508 **3.7.2. Effects on *C. gigas* Midori stocks**

509 The probiotic treatment resulted in an average settlement and metamorphosis rate of 22.21%  
510 for naturally set Midori larvae versus 15.34% for non-probiotic treated controls (S5 Figure).  
511 With epinephrine, 34.46% of the larvae successfully metamorphosed compared to 29.36%  
512 without a probiotic addition. The total metamorphosis of Midori larvae treated with probiotics  
513 was 56.67% versus 44.7% ( $P=.015$ ) (Table 2).

514

### 515 **3.7.3. Effects on *C. sikamea* (Kumamoto) oysters**

516 With Kumamoto oysters, the probiotic treatment increased the proportion of successfully  
517 naturally set and metamorphosed larvae to 26.18% compared to 21.31% of non-probiotic  
518 treated larvae (S6 Figure). The epinephrine treatment resulted in 31.72% metamorphosis  
519 versus 24.82% for non-probiotic treated larvae. The total proportion of successfully  
520 metamorphosed spat was 57.9% with the addition of probiotics, while non-probiotic treated

521 Kumamoto larvae had a significantly lower total metamorphosis success of 46.14% ( $P=.004$ )  
522 (Table 2).

523

## 524 **4. Discussion**

525 This study describes the development of a promising novel probiotic treatment for both disease  
526 prevention and enhancement of larval development. The treatment consisted of a combination  
527 of three individual beneficial bacterial isolates added to the larvae culture once at 24 hpf. This  
528 treatment significantly improved the survival of Pacific oyster larvae exposed to a lethal dose of  
529 a highly virulent *V. coralliilyticus* strain RE22 added 24 hours after the probiotic addition. In  
530 addition, a single dose of the probiotics 24 hpf improved subsequent growth of Pacific oyster  
531 larvae and resulted in higher larval settlement and metamorphosis success for two stocks of  
532 Pacific oysters and for the Kumamoto oyster. Larval metamorphosis and post-settlement  
533 survival are common seed production problems for commercial hatcheries (Barton et al. 2012).

534 Initial selective steps in choosing probiotic candidates in this study included survival of freeze-  
535 thaw steps, absence of pathogenicity towards larvae, and the ability to suppress the growth of  
536 *V. coralliilyticus* strain RE22 using agar plate assays. Due to the various possible modes of  
537 probiotic action, agar plate assays are arguably not definitive in predicting pathogen  
538 suppression in culture systems because other modes of action could be overlooked in the  
539 process. In addition, growth on the *Vibrio*-selective agar (TCBS) led to the exclusion of  
540 candidates with antagonistic properties. Due to likely intense interspecies competition in this  
541 genus (see, for example, Borgeaud et al. 2015), *Vibrio* spp. often displayed moderate to strong

542 inhibition of the target strain on agar plates and *Vibrio* isolate B1 showed promise in survival  
543 assays with oyster larvae. For unknown reasons, B1 failed to grow on TCBS plates at the  
544 screening stage and was only subsequently identified as a *Vibrio* sp. by sequencing leading to its  
545 exclusion from further testing. Members of the genus *Vibrio* were intentionally excluded from  
546 the probiotic combination as they have the ability to quickly adapt to new environments and  
547 acquire virulence factors by horizontal gene transfer that could potentially transform the isolate  
548 from an oyster commensal to a pathogen (Bruto et al., 2017; Le Roux & Blokesch, 2018).

549 Individual probiotic candidates that improved mean RPS in initial screenings by at least 40%  
550 compared to a non-probiotic treated control, were selected for inclusion in the probiotic  
551 combination. Ultimately, a combination of the three isolates B11, DM14, and D16 significantly  
552 increased the efficacy of the treatment. High variations were observed in these assays  
553 irrespective of probiotic isolate, larval rearing method, including larval density and rearing  
554 volume (well-plates or 10-L containers), or seawater quality (autoclaved or 10 µm-filtered).  
555 Such variation seems common in trials with oyster probiotics (Sohn et al., 2016) and may be  
556 due to small, uncontrolled differences in environmental conditions among replicates that affect  
557 the bacterial composition of the cultures, microbiome or host-microbe interactions (Stevick et  
558 al., 2019).

559 Application of probiotics in aquaculture systems, including probiotics tested in oyster  
560 hatcheries, are commonly dependent on repeated probiotic dosing (Kapareiko et al., 2011;  
561 Sohn et al., 2016). It has been suggested that repeated additions are necessary due to the  
562 inability of the probiotic bacteria to permanently colonize the animal's mucosal surfaces,  
563 including the gut (Gatesoupe, 1999). This study evaluated whether repeated dosing after each

564 water change was required for prolonged beneficial effects of the probiotic combination. We  
565 found significant improvements in growth at day 12 as well as subsequent settlement and  
566 metamorphosis success for *C. gigas* larvae with a single dose of the probiotic combination at 24  
567 hpf; however, repetitive dosing was less beneficial. Significantly improved metamorphosis and  
568 settlement with a single dose of probiotics at 24 hpf was consistent for larvae from two stocks  
569 of *C. gigas* (Midori and Myagi) and *C. sikamea* (Kumamoto) oysters. It is known that bacteria  
570 affect bivalve settlement via biofilm formation or secretion of chemical settlement cues (W. K.  
571 Fitt et al., 1990; Weiner et al., 1985). However, after multiple water changes, it is unlikely that  
572 the initial probiotic dosing between 24 and 72 hpf influenced subsequent biofilm formation or  
573 settlement cues more than two weeks later.

574 In the past decade, research efforts have focused on identifying new probiotics intended to  
575 increase the survival of oyster larvae exposed to pathogens (e.g., (Karim et al., 2013; Kesarcodi-  
576 Watson et al., 2012; Lim et al., 2011)). It has been found that the early establishment of the  
577 microbiome in oyster larvae is beneficial to early oyster development and survival (Gomez-Gil  
578 et al., 2000; Harris, 1993; Kesarcodi-Watson et al., 2012; Prado et al., 2010; Schulze et al.,  
579 2006). Knowledge of the beneficial modes of action of probiotics is sparse, particularly in the  
580 aquatic environment when probiotic benefits could be related to interactions with the rearing  
581 environment, the host-associated microbial community, or with the host's eukaryotic cells  
582 (Gomez-Gil et al., 2000; Lebeer et al., 2010; Prado et al., 2010; Van Doan et al., 2020). These  
583 modes could include modulation of the resident microbiome to a more beneficial state, direct  
584 antagonism against individual cells of a pathogen, such as killing by direct contact and toxin  
585 secretion, production of antimicrobials, or by changing environmental conditions in ways that

586 limit pathogen growth via competitive exclusion. Probiotics may also directly interact with the  
587 eukaryotic cells of the host and contribute to digestion by supplying enzymes, acting as a  
588 nutritional source, restoring mucosal integrity and barrier functions, or modulating the immune  
589 response (Kesarcodi-Watson et al., 2008; Verschuere et al., 2000).

590 It is conceivable that multiple modes of action are present in an individual probiotic or that a  
591 combination treatment, as studied in this work, could take advantage of different modes of  
592 action. Further advantages of combination treatments could be due to a broader spectrum of  
593 activity against different pathogen strains or species, retention of beneficial activity even if a  
594 single probiotic constituent fails, and potentially reducing selective pressures against probiotic  
595 isolates that decrease benefits.

596 Further investigations are needed to explore the modes of action of new probiotic treatments  
597 in oyster larvae, such as the effect of probiotic additions on the host's microbiome and the  
598 microbial communities of the rearing environment (e.g., Modak & Gomez-Chiarri, 2020; Sohn et  
599 al., 2016; Stevick et al., 2019). Such research efforts will help support a sustainable oyster  
600 industry facing many challenges due to global warming and ocean acidification.

601

## 602 **Acknowledgments**

603 The authors thank the MBP staff for their support in rearing larvae, Jennifer Hesser for assisting  
604 in some of the experiments, MK English for the 16S rRNA gene sequencing of the probiotic  
605 candidates. Whiskey Creek hatchery and Oregon Oyster Farms, Oregon, kindly provided  
606 biological materials for isolation of candidate probiotics. This work was supported by a NOAA

607 National Sea Grant [NA18OAR4170346] awarded to CS, CL, and RM, and a NOAA Saltonstall-  
608 Kennedy grant [NA18NMF4270220] awarded to CL.

609

610 **Appendix A. Supplementary figures S1 – S6.**

611 **Appendix B. Supplementary tables S1 – S8.**

612

613 **CRedit author statement**

614 **David Madison:** Conceptualization, Methodology, Investigation, Data curation, Writing –  
615 Review & Editing.

616 **Carla Schubiger:** Conceptualization, Methodology, Investigation, Resources, Writing – Original  
617 Draft, Visualization, Supervision, Project Administration, Funding Acquisition.

618 **Spencer Lunda:** Formal analysis, Data curation, Writing – Review & Editing, Visualization.

619 **Ryan S. Mueller:** Conceptualization, Methodology, Investigation, Resources, Writing – Review &  
620 Editing, Supervision, Funding Acquisition.

621 **Chris Langdon:** Conceptualization, Methodology, Resources, Writing – Review & Editing,  
622 Supervision, Project Administration, Funding Acquisition.

623

624

625



## 626 **References**

- 627 Altschul, S. F., Gish, W., Miller, W., Myers, E. W., & Lipman, D. J. (1990). Basic local alignment  
628 search tool. *Journal of Molecular Biology*, 215(3), 403–410.  
629 [https://doi.org/10.1016/S0022-2836\(05\)80360-2](https://doi.org/10.1016/S0022-2836(05)80360-2)
- 630 Alves Jr, N., Neto, O. S. M., Silva, B. S. O., De Moura, R. L., Francini-Filho, R. B., Barreira e Castro,  
631 C., Paranhos, R., Bitner-Mathé, B. C., Kruger, R. H., Vicente, A. C. P., Thompson, C. C., &  
632 Thompson, F. L. (2009). Diversity and pathogenic potential of vibrios isolated from  
633 Abrolhos Bank corals. *Environmental Microbiology Reports*, 2(1), 90–95.  
634 <https://doi.org/10.1111/j.1758-2229.2009.00101.x>
- 635 Austin, B., Austin, D., Sutherland, R., Thompson, F., & Swings, J. (2005). Pathogenicity of vibrios  
636 to rainbow trout (*Oncorhynchus mykiss*, Walbaum) and *Artemia nauplii*. *Environmental*  
637 *Microbiology*, 7(9), 1488–1495. <https://doi.org/10.1111/j.1462-2920.2005.00847.x>
- 638 Barton, A., Hales, B., Waldbusser, G. G., Langdon, C., & Feely, R. A. (2012). The Pacific oyster,  
639 *Crassostrea gigas*, shows negative correlation to naturally elevated carbon dioxide levels:  
640 Implications for near-term ocean acidification effects. *Limnology and Oceanography*, 57(3),  
641 698–710. <https://doi.org/10.4319/lo.2012.57.3.0698>
- 642 Borgeaud, S., Metzger, L. C., Scignari, T., Blokesch, M. (2015). The Type VI Secretion System of  
643 *Vibrio Cholerae* fosters horizontal gene transfer. *Science*, 347 (6217), 63–67.  
644 <https://doi.org/10.1126/science.1260064>.
- 645 Bruto, M., James, A., Petton, B., Labreuche, Y., Chenivesse, S., Alunno-Bruscia, M., Polz, M. F., &

- 646 Le Roux, F. (2017). *Vibrio crassostreae*, a benign oyster colonizer turned into a pathogen  
647 after plasmid acquisition. *The ISME Journal*, 11(4), 1043–1052.  
648 <https://doi.org/10.1038/ismej.2016.162>
- 649 Cabello, F. C., Godfrey, H. P., Tomova, A., Ivanova, L., Dölz, H., Millanao, A., & Buschmann, A. H.  
650 (2013). Antimicrobial use in aquaculture re-examined: its relevance to antimicrobial  
651 resistance and to animal and human health. *Environmental Microbiology*, 15(7), 1917–  
652 1942. <https://doi.org/10.1111/1462-2920.12134>
- 653 Campbell, A. H., Meritt, D. W., Franklin, R. B., Boone, E. L., Nicely, C. T., & Brown, B. L. (2011).  
654 Effects of age and composition of field-produced biofilms on oyster larval setting.  
655 *Biofouling*, 27(3), 255–265. <https://doi.org/10.1080/08927014.2011.560384>
- 656 Crump, B. C., Kling, G. W., Bahr, M., & Hobbie, J. E. (2003). Bacterioplankton community shifts  
657 in an Arctic lake correlate with seasonal changes in organic matter source. *Applied and*  
658 *Environmental Microbiology*, 69(4), 2253–2268. [https://doi.org/10.1128/AEM.69.4.2253-](https://doi.org/10.1128/AEM.69.4.2253-2268.2003)  
659 [2268.2003](https://doi.org/10.1128/AEM.69.4.2253-2268.2003)
- 660 de Melo, C. M. R., Divilov, K., Durland, E., Schoolfield, B., Davis, J., Carnegie, R. B., Reece, K. S.,  
661 Evans, F., & Langdon, C. (2021). Introduction and evaluation on the US West Coast of a  
662 new strain (Midori) of Pacific oyster (*Crassostrea gigas*) collected from the Ariake Sea,  
663 southern Japan. *Aquaculture*, 531, 735970.  
664 <https://doi.org/10.1016/j.aquaculture.2020.735970>
- 665 Devakie, M. ., & Ali, A. . (2002). Effective use of plastic sheet as substrate in enhancing tropical  
666 oyster (*Crassostrea iredalei* Faustino) larvae settlement in the hatchery. *Aquaculture*,

- 667 212(1–4), 277–287. [https://doi.org/10.1016/S0044-8486\(02\)00270-3](https://doi.org/10.1016/S0044-8486(02)00270-3)
- 668 Dobretsov, S., Dahms, H.-U., & Qian, P.-Y. (2006). Inhibition of biofouling by marine  
669 microorganisms and their metabolites. *Biofouling*, 22(1), 43–54.  
670 <https://doi.org/10.1080/08927010500504784>
- 671 Douillet, P., & Langdon, C. J. (1993). Effects of Marine Bacteria on the Culture of Axenic Oyster  
672 *Crassostrea gigas* (Thunberg) Larvae. *The Biological Bulletin*, 184(1), 36–51.  
673 <https://doi.org/10.2307/1542378>
- 674 Durland, E., Waldbusser, G., & Langdon, C. (2019). Comparison of larval development in  
675 domesticated and naturalized stocks of the Pacific oyster *Crassostrea gigas* exposed to  
676 high pCO<sub>2</sub> conditions. *Marine Ecology Progress Series*, 621, 107–125.  
677 <https://doi.org/10.3354/meps12983>
- 678 El-Saadony, M. T., Alagawany, M., Patra, A. K., Kar, I., Tiwari, R., Dawood, M. A. O., Dhama, K., &  
679 Abdel-Latif, H. M. R. (2021). The functionality of probiotics in aquaculture: An overview.  
680 *Fish & Shellfish Immunology*, 117, 36–52. <https://doi.org/10.1016/j.fsi.2021.07.007>
- 681 Elston, R., Hasegawa, H., Humphrey, K. L., Polyak, I. K., & Häse, C. C. (2008). Re-emergence of  
682 *Vibrio tubiashii* in bivalve shellfish aquaculture: severity, environmental drivers, geographic  
683 extent and management. *Diseases of Aquatic Organisms*, 82(2), 119–134.  
684 <https://doi.org/10.3354/dao01982>
- 685 Estes, R. M., Friedman, C. S., Elston, R. A., & Herwig, R. P. (2004). Pathogenicity testing of  
686 shellfish hatchery bacterial isolates on Pacific oyster *Crassostrea gigas* larvae. *Diseases of*

- 687 *Aquatic Organisms*, 58(2–3), 223–230. <https://doi.org/10.3354/dao058223>
- 688 Fitt, W. K., Coon, S. L., Walch, M., Weiner, R. M., Colwell, R. R., & Bonar, D. B. (1990).  
689 Settlement behavior and metamorphosis of oyster larvae (*Crassostrea gigas*) in response  
690 to bacterial supernatants. *Marine Biology*, 106(3), 389–394.  
691 <https://doi.org/10.1007/BF01344317>
- 692 Fitt, William K., Labare, M. P., Fuqua, W. C., Walch, M., Coon, S. L., Bonar, D. B., Colwell, R. R., &  
693 Weiner, R. M. (1989). Factors influencing bacterial production of inducers of settlement  
694 behavior of larvae of the oyster *Crassostrea gigas*. *Microbial Ecology*, 17(3), 287–298.  
695 <https://doi.org/10.1007/BF02012841>
- 696 Freckelton, M. L., Nedved, B. T., & Hadfield, M. G. (2017). Induction of Invertebrate Larval  
697 Settlement; Different Bacteria, Different Mechanisms? *Scientific Reports*, 7(1), 42557.  
698 <https://doi.org/10.1038/srep42557>
- 699 Gatesoupe, F. . (1999). The use of probiotics in aquaculture. *Aquaculture*, 180(1–2), 147–165.  
700 [https://doi.org/10.1016/S0044-8486\(99\)00187-8](https://doi.org/10.1016/S0044-8486(99)00187-8)
- 701 Gilbert, J. A., Steele, J. A., Caporaso, J. G., Steinbrück, L., Reeder, J., Temperton, B., Huse, S.,  
702 McHardy, A. C., Knight, R., & Joint, I. (2012). Defining seasonal marine microbial  
703 community dynamics. *The ISME Journal*, 6(2), 298–308.
- 704 Gomez-Gil, B., Roque, A., & Turnbull, J. F. (2000). The use and selection of probiotic bacteria for  
705 use in the culture of larval aquatic organisms. *Aquaculture*, 191(1–3), 259–270.  
706 [https://doi.org/10.1016/S0044-8486\(00\)00431-2](https://doi.org/10.1016/S0044-8486(00)00431-2)

- 707 Gray, M. W., Alexander, S. T., Beal, B. F., Bliss, T., Burge, C. A., Cram, J. A., Luca, M. De,  
708 Dumhart, J., Glibert, P. M., Gonsior, M., Heyes, A., Huebert, K. B., Lyubchich, V., McFarland,  
709 K., Parker, M., Plough, L. V., Schott, E. J., Wainger, L. A., Wikfors, G. H., & Wilbur, A. E.  
710 (2022). Hatchery crashes among shellfish research hatcheries along the Atlantic coast of  
711 the United States: A case study of production analysis at Horn Point Laboratory.  
712 *Aquaculture*, 546, 737259. <https://doi.org/10.1016/j.aquaculture.2021.737259>
- 713 Harris, J. (1993). The presence, nature, and role of gut microflora in aquatic invertebrates: A  
714 synthesis. *Microbial Ecology*, 25(3). <https://doi.org/10.1007/BF00171889>
- 715 Jeffries, V. E. (1982). Three *Vibrio* strains pathogenic to larvae of *Crassostrea gigas* and *Ostrea*  
716 *edulis*. *Aquaculture*, 29(3–4), 201–226. [https://doi.org/10.1016/0044-8486\(82\)90136-3](https://doi.org/10.1016/0044-8486(82)90136-3)
- 717 Jorquera, M. A., Silva, F. R., & Riquelme, C. E. (2001). Bacteria in the culture of the scallop  
718 *Argopecten*. *Aquaculture Economics and Management*, 9(Lozano 2000), 285–303.
- 719 Kapareiko, D., Lim, H. J., Schott, E. J., Hanif, A., & Wikfors, G. H. (2011). Isolation and evaluation  
720 of new probiotic bacteria for use in shellfish hatcheries: II. Effects of a *Vibrio* sp. probiotic  
721 candidate upon survival of oyster larvae (*Crassostrea virginica*) in pilot-scale trials. *Journal*  
722 *of Shellfish Research*, 30(3), 617–625. <https://doi.org/10.2983/035.030.0304>
- 723 Karim, M., Zhao, W., Rowley, D., Nelson, D., & Gomez-Chiarri, M. (2013). Probiotic strains for  
724 shellfish aquaculture: Protection of Eastern oyster, *Crassostrea virginica*, larvae and  
725 juveniles against bacterial challenge. *Journal of Shellfish Research*, 32(2), 401–408.  
726 <https://doi.org/10.2983/035.032.0220>

- 727 Kehlet-Delgado, H., Richards, G. P., Häse, C., & Mueller, R. S. (2017). Three draft genome  
728 sequences of *Vibrio coralliilyticus* strains isolated from bivalve hatcheries. *Genome*  
729 *Announcements*, 5(41). <https://doi.org/10.1128/genomeA.01162-17>
- 730 Kesarcodi-Watson, A., Kaspar, H., Lategan, M. J., & Gibson, L. (2008). Probiotics in aquaculture:  
731 the need, principles and mechanisms of action and screening processes. *Aquaculture*,  
732 274(1), 1–14.
- 733 Kesarcodi-Watson, A., Kaspar, H., Lategan, M. J., & Gibson, L. (2009). Two pathogens of  
734 Greenshell mussel larvae, *Perna canaliculus*: *Vibrio splendidus* and a *V.*  
735 *coralliilyticus*/neptunius-like isolate. *Journal of Fish Diseases*, 32(6), 499–507.  
736 <https://doi.org/10.1111/j.1365-2761.2009.01006.x>
- 737 Kesarcodi-Watson, A., Miner, P., Nicolas, J.-L., & Robert, R. (2012). Protective effect of four  
738 potential probiotics against pathogen-challenge of the larvae of three bivalves: Pacific  
739 oyster (*Crassostrea gigas*), flat oyster (*Ostrea edulis*) and scallop (*Pecten maximus*).  
740 *Aquaculture*, 344–349, 29–34. <https://doi.org/10.1016/j.aquaculture.2012.02.029>
- 741 Kim, H. J., Jun, J. W., Giri, S. S., Chi, C., Yun, S., Kim, S. G., Kim, S. W., Han, S. J., Kwon, J., Oh, W.  
742 T., Lee, S. Bin, Kim, J. H., & Park, S. C. (2020). Identification and genome analysis of *Vibrio*  
743 *coralliilyticus* causing mortality of Pacific oyster (*Crassostrea gigas*) Larvae. *Pathogens*,  
744 9(3), 206. <https://doi.org/10.3390/pathogens9030206>
- 745 Langdon, C., Evans, F., Jacobson, D., & Blouin, M. (2003). Yields of cultured Pacific oysters  
746 *Crassostrea gigas* Thunberg improved after one generation of selection. *Aquaculture*,  
747 220(1–4), 227–244.

- 748 Le Roux, F., & Blokesch, M. (2018). Eco-evolutionary dynamics linked to horizontal gene transfer  
749 in Vibrios. *Annual Review of Microbiology*, 72(1), 89–110.  
750 <https://doi.org/10.1146/annurev-micro-090817-062148>
- 751 Lebeer, S., Vanderleyden, J., & De Keersmaecker, S. C. J. (2010). Host interactions of probiotic  
752 bacterial surface molecules: comparison with commensals and pathogens. *Nature Reviews*  
753 *Microbiology*, 8(3), 171–184. <https://doi.org/10.1038/nrmicro2297>
- 754 Lim, H. J., Kapareiko, D., Schott, E. J., Hanif, A., & Wikfors, G. H. (2011). Isolation and evaluation  
755 of new probiotic bacteria for use in shellfish hatcheries: I. Isolation and screening for  
756 bioactivity. *Journal of Shellfish Research*, 30(3), 609–615.  
757 <https://doi.org/10.2983/035.030.0303>
- 758 Madison, D., Richards, G. P., Sulakvelidze, A., Langdon, C. (2022). Bacteriophages improve  
759 survival and metamorphosis of larval Pacific oysters (*Crassostrea gigas*) exposed to *Vibrio*  
760 *coralliilyticus* strain RE98. *Aquaculture*, 555, 738242.  
761 <https://doi.org/10.1016/j.aquaculture.2022.738242>.
- 762 Marques, A., Ollevier, F., Verstraete, W., Sorgeloos, P., & Bossier, P. (2006). Gnotobiotically  
763 grown aquatic animals: Opportunities to investigate host-microbe interactions. *Journal of*  
764 *Applied Microbiology*, 100(5), 903–918. <https://doi.org/10.1111/j.1365-2672.2006.02961.x>
- 765 Modak, T. H., & Gomez-Chiarri, M. (2020). Contrasting immunomodulatory effects of probiotic  
766 and pathogenic bacteria on Eastern oyster, *Crassostrea virginica*, larvae. *Vaccines*, 8(4),  
767 588. <https://doi.org/10.3390/vaccines8040588>

- 768 Oh, M. H., Lee, S. M., Lee, D. H., & Choi, S. H. (2009). Regulation of the *Vibrio vulnificus hupA*  
769 gene by temperature alteration and cyclic AMP receptor protein and evaluation of its role  
770 in virulence. *Infection and Immunity*, 77(3), 1208–1215. [https://doi.org/10.1128/IAI.01006-](https://doi.org/10.1128/IAI.01006-08)  
771 08
- 772 Pérez-Sánchez, T., Mora-Sánchez, B., & Balcázar, J. L. (2018). Biological approaches for disease  
773 control in aquaculture: Advantages, limitations and challenges. *Trends in Microbiology*,  
774 26(11), 896–903. <https://doi.org/10.1016/j.tim.2018.05.002>
- 775 Prado, S., Romalde, J. L., & Barja, J. L. (2010). Review of probiotics for use in bivalve hatcheries.  
776 *Veterinary Microbiology*, 145(3–4), 187–197.  
777 <https://doi.org/10.1016/j.vetmic.2010.08.021>
- 778 Richards, G. P., Bono, J. L., Watson, M. A., & Needleman, D. S. (2014). Complete genome  
779 sequence for the shellfish pathogen *Vibrio coralliilyticus* RE98 Isolated from a shellfish  
780 hatchery. *Genome Announcements*, 2(6). <https://doi.org/10.1128/genomeA.01253-14>
- 781 Richards, G. P., Kingham, B. F., Olga, S., Watson, M. A., Needleman, D. S., & Cameron, T. J.  
782 (2021). Complete genome sequence of *Vibrio coralliilyticus* RE22, a marine bacterium  
783 pathogenic toward larval shellfish. *Microbiology Resource Announcements*, 7(17), e01332-  
784 18. <https://doi.org/10.1128/MRA.01332-18>
- 785 Richards, G. P., Watson, M. A., Needleman, D. S., Church, K. M., & Häse, C. C. (2015). Mortalities  
786 of Eastern and Pacific oyster larvae caused by the pathogens *Vibrio coralliilyticus* and  
787 *Vibrio tubiashii*. *Applied and Environmental Microbiology*, 81(1), 292–297.  
788 <https://doi.org/10.1128/AEM.02930-14>



- 789 Rodriguez-Perez, A., James, M., Donnan, D. W., Henry, T. B., Møller, L. F., & Sanderson, W. G.  
790 (2019). Conservation and restoration of a keystone species: Understanding the settlement  
791 preferences of the European oyster (*Ostrea edulis*). *Marine Pollution Bulletin*, *138*, 312–  
792 321. <https://doi.org/10.1016/j.marpolbul.2018.11.032>
- 793 Schulze, A. D., Alabi, A. O., Tattersall-Sheldrake, A. R., & Miller, K. M. (2006). Bacterial diversity  
794 in a marine hatchery: Balance between pathogenic and potentially probiotic bacterial  
795 strains. *Aquaculture*, *256*(1–4), 50–73. <https://doi.org/10.1016/j.aquaculture.2006.02.008>
- 796 Sohn, S., Lundgren, K. M., Tammi, K., Karim, M., Smolowitz, R., Nelson, D. R., Rowley, D. C., &  
797 Gómez-Chiarri, M. (2016). Probiotic strains for disease management in hatchery  
798 larviculture of the Eastern oyster *Crassostrea virginica*. *Journal of Shellfish Research*, *35*(2),  
799 307–317. <https://doi.org/10.2983/035.035.0205>
- 800 Stevick, R. J., Sohn, S., Modak, T. H., Nelson, D. R., Rowley, D. C., Tammi, K., Smolowitz, R.,  
801 Markey Lundgren, K., Post, A. F., & Gómez-Chiarri, M. (2019). Bacterial community  
802 dynamics in an oyster hatchery in response to probiotic treatment. *Frontiers in*  
803 *Microbiology*, *10*. <https://doi.org/10.3389/fmicb.2019.01060>
- 804 Takemura, A. F., Chien, D. M., & Polz, M. F. (2014). Associations and dynamics of Vibrionaceae  
805 in the environment, from the genus to the population level. *Frontiers in Microbiology*, *5*.  
806 <https://doi.org/10.3389/fmicb.2014.00038>
- 807 Tritar, S., Prieur, D., & Weiner, R. (1992). Effect of bacterial films on the settlement of the  
808 oysters, *Crassostrea gigas* (Thunberg, 1793) and *Ostrea edulis*, Linnaeus, 1750 and the  
809 scallop *Pecten maximus* (Linnaeus, 1758). *Journal of Shellfish Research*, *11*(2), 325–330.

- 810 Van Doan, H., Hoseinifar, S. H., Ringø, E., Ángeles Esteban, M., Dadar, M., Dawood, M. A. O., &  
811 Faggio, C. (2020). Host-associated probiotics: A key factor in sustainable aquaculture.  
812 *Reviews in Fisheries Science & Aquaculture*, 28(1), 16–42.  
813 <https://doi.org/10.1080/23308249.2019.1643288>
- 814 Verschuere, L., Rombaut, G., Sorgeloos, P., & Verstraete, W. (2000). Probiotic bacteria as  
815 biological control agents in aquaculture. *Microbiology and Molecular Biology Reviews*,  
816 64(4), 655–671. <https://doi.org/10.1128/MMBR.64.4.655-671.2000>
- 817 Vezzulli, L., Previati, M., Pruzzo, C., Marchese, A., Bourne, D. G., & Cerrano, C. (2010). *Vibrio*  
818 infections triggering mass mortality events in a warming Mediterranean Sea.  
819 *Environmental Microbiology*, 12(7), 2007–2019. [https://doi.org/10.1111/j.1462-](https://doi.org/10.1111/j.1462-2920.2010.02209.x)  
820 [2920.2010.02209.x](https://doi.org/10.1111/j.1462-2920.2010.02209.x)
- 821 Walch, M., Weiner, R. M., Colwell, R. R., & Coon, S. L. (1999). Use of L-DOPA and soluble  
822 bacterial products to improve set of *Crassostrea virginica* (Gmelin, 1791) and *C. gigas*  
823 (Thunberg, 1793). *Journal of Shellfish Research*, 18(1), 133–138.
- 824 Weiner, R. M., Segall, A. M., & Colwell, R. R. (1985). Characterization of a marine bacterium  
825 associated with *Crassostrea virginica* (the Eastern oyster). *Applied and Environmental*  
826 *Microbiology*, 49(1), 83–90. <https://doi.org/10.1128/aem.49.1.83-90.1985>
- 827 Wieczorek, S. K., & Todd, C. D. (1998). Inhibition and facilitation of settlement of epifaunal  
828 marine invertebrate larvae by microbial biofilm cues. *Biofouling*, 12(1–3), 81–118.  
829 <https://doi.org/10.1080/08927019809378348>

830 Zhao, B., Zhang, S., & Qian, P.-Y. (2003). Larval settlement of the silver- or goldlip pearl oyster

831 *Pinctada maxima* (Jameson) in response to natural biofilms and chemical cues.

832 *Aquaculture*, 220(1–4), 883–901. [https://doi.org/10.1016/S0044-8486\(02\)00567-7](https://doi.org/10.1016/S0044-8486(02)00567-7)

833
